# Supplementary material for: Qualification of a Biolayer Interferometry Assay to Support AZD7442 Resistance Monitoring
Source: PubMed Central journal article supplement (PMC9704045; doi:10.1128/spectrum.01034-22), 2022-08-22
Supplement: spectrum.01034-22-s0001.pdf [file spectrum.01034-22-s0001.pdf]

## Appendix

**Table A1. Comparison of  $K_D$  for different antigen : analyte formats**

|                            |                          | Tixagevimab   |               | Cilgavimab    |               |
|----------------------------|--------------------------|---------------|---------------|---------------|---------------|
|                            |                          | IgG $K_D$ (M) | Fab $K_D$ (M) | IgG $K_D$ (M) | Fab $K_D$ (M) |
| <b>Wildtype</b>            | <b>Trimer</b>            | 2.88E-10      | 6.40E-09      | <1.0E-12      | 1.20E-08      |
|                            | <b>RBD<sup>3,4</sup></b> |               | 6.56E-09      |               | 1.34E-08      |
| <b>B.1.1.7<sup>1</sup></b> | <b>Trimer</b>            | 1.72E-10      | 2.31E-08      | <1.0E-12      | 7.80E-09      |
|                            | <b>RBD<sup>3,4</sup></b> |               | 8.66E-09      |               | 1.10E-08      |
| <b>B.1.351<sup>2</sup></b> | <b>Trimer</b>            | 1.50E-10      | 5.96E-08      | <1.0E-12      | 9.67E-09      |
|                            | <b>RBD<sup>3,4</sup></b> |               | 4.68E-08      |               | 1.22E-08      |

<sup>1</sup>Spike substitutions for B.1.1.7 in this assay were the following:

HV69-:Y144-:N501Y:A570D:D614G:P681H:T716I:S982A:D1118H.

<sup>2</sup>Spike substitutions for B.1.351 in this assay were the following:

D80A:D215G:LLA241-:K417N:E484K:N501Y:D614G:A701V.

<sup>3</sup>The RBD constructs (amino acid 333-526) contained a his-tag and were loaded on penta-his biosensor tips; all assay steps were as described in the methods.

<sup>4</sup>RBD was loaded on the tips to the same 0.8 nm shift threshold as trimer. All  $K_D$  values for both IgG mAbs were <1E-12M (blocked out). As RBD is much smaller, more RBD antigen was loaded on the tips. This suggests IgG was able to bind two adjacent RBD antigens simultaneously, creating a strong avidity effect that severely reduced dissociation time, rendering it below the instrument detection limit.

Fab, antibody fragment; IgG, immunoglobulin G;  $K_D$ , equilibrium dissociation constant; RBD, receptor binding domain.

**Table A2. Analyte concentrations (nmol/L) for establishing assay parameters**

| <b>Row</b> | <b>N12</b> | <b>tixagevimab</b> | <b>cilgavimab</b> | <b>CV7</b> | <b>ACE2-Fc</b> |
|------------|------------|--------------------|-------------------|------------|----------------|
| A          | 50         | 150                | 150               | 5000       | 1000           |
| C          | 25         | 75                 | 75                | 2500       | 500            |
| E          | 12.5       | 37.5               | 37.5              | 1250       | 250            |
| G          | 6.25       | 18.75              | 18.75             | 625        | 125            |
| I          | 3.13       | 9.38               | 9.38              | 312.5      | 62.5           |
| K          | 1.56       | 4.69               | 4.69              | 156.25     | 31.25          |
| M          | 0.78       | 2.34               | 2.34              | 78.13      | 15.63          |
| O          | 0          | 0                  | 0                 | 0          | 0              |

ACE2, angiotensin-converting enzyme 2.

## Statistical evaluation

### ***Precision across all spike variants by linear mixed-effects model***

$$y_{ijkl} = \text{Variant}_i + mAb_j + A_k + e_{ijkl} \quad (1)$$

Where  $y_{ijkl}$  is the  $\ln(KD)$  value of the  $l^{th}$  replicate for the  $i^{th}$  variant, the  $j^{th}$  mAb ran on the  $k^{th}$  assay;

$\text{Variant}_i$  is the mean effect of the  $i^{th}$  virus;

$mAb_j$  is the mean effect of the  $j^{th}$  mAb

$A_k \sim N(0, \sigma_R^2)$  is the random effect of the  $k^{th}$  assay,  $\sigma_R$  is the inter-assay variation; and

$e_{ijkl} \sim N(0, \sigma_e^2)$  is the residual error,  $\sigma_e$  is the within-assay variation (repeatability).

Intra-assay (repeatability), inter-assay, and intermediate precision were calculated using the following formulas:

$$\%CV_{intra} = 100\% \times \sqrt{e^{\sigma_e^2} - 1}$$

$$\%CV_{inter} = 100\% \times \sqrt{e^{\sigma_R^2} - 1}$$

$$\%CV_{intermediate} = 100\% \times \sqrt{e^{\sigma_e^2 + \sigma_R^2} - 1}$$

### ***Bayesian statistical methods and prior distributions***

Bayesian methods were used to estimate the means and the components of variability, reported as the median of the respective posterior distributions. The log shift of one variant relative to the reference variant was calculated as  $\delta_v = \mu_v - \mu_0$ ,

where  $\mu_0$  is the mean of the reference variant,  $\mu_v$  is the mean of the variant  $v$ . Fold-shift was calculated as  $\exp(\delta_v)$  and reported as the median of the posterior distribution. Bayesian methods required prior information to be blended with the study data, yielding the posterior distribution used in statistical analysis. For the prior distributions, normal distributions were provided for the means, and half-Cauchy distributions were provided for SD parameters (**Table A3**).

**Table A3. Prior distributions**

|                            | <b>Prior distribution</b>                                                                                      |
|----------------------------|----------------------------------------------------------------------------------------------------------------|
| Mean effect                | Normal distribution with mean taken from the estimates from fitting model (1) using REML-based method, SD 0.35 |
| SD for variance components | Half-Cauchy with scale 0.4                                                                                     |

REML, restricted (or residual, or reduced) maximum likelihood; SD, standard deviation.

**Figure A1. Assay traces for mock trimer (left) and RSV trimer (right)**

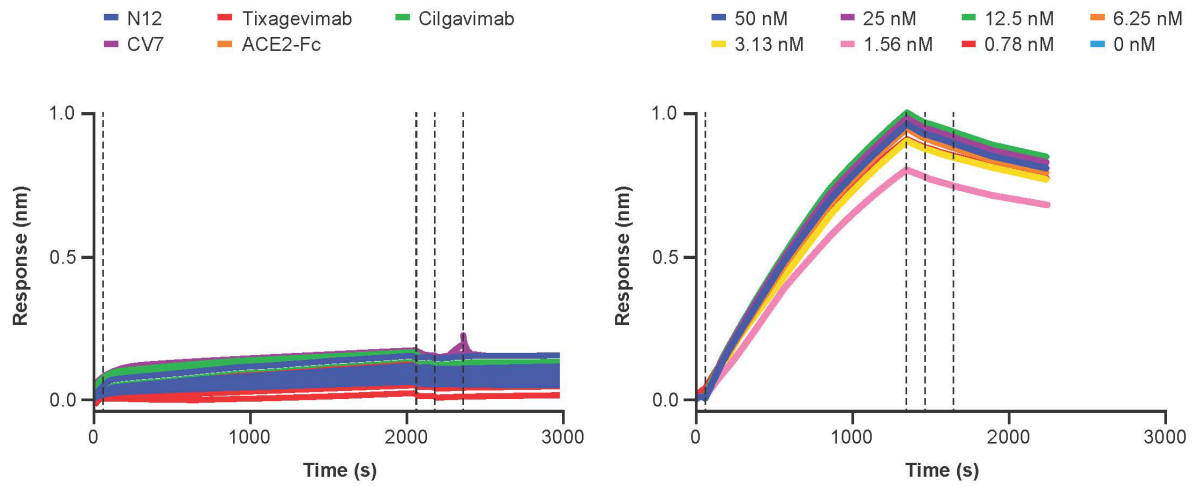

Left: Mock transfection used as trimer in the load phase. Baseline: 0-60s; load: 60-2060s; baseline: 2060-2180s; association: 2180-2360s; dissociation: 2360-2960s. Right: RSV F trimer added in load phase. Baseline: 0-60s; load: 60-1347s; baseline: 1347-1467s; association: 1467-1647s; dissociation: 1647-2247s. Representative traces show RSV trimer with N12 as the analyte at the designated concentrations.
